# Supplementary material for: OCIAD1 is a host mitochondrial substrate of the hepatitis C virus NS3-4A protease
Source: PubMed Central journal article supplement (PMC7375614; doi:10.1371/journal.pone.0236447), 2020-07-22

**Figure 1A**

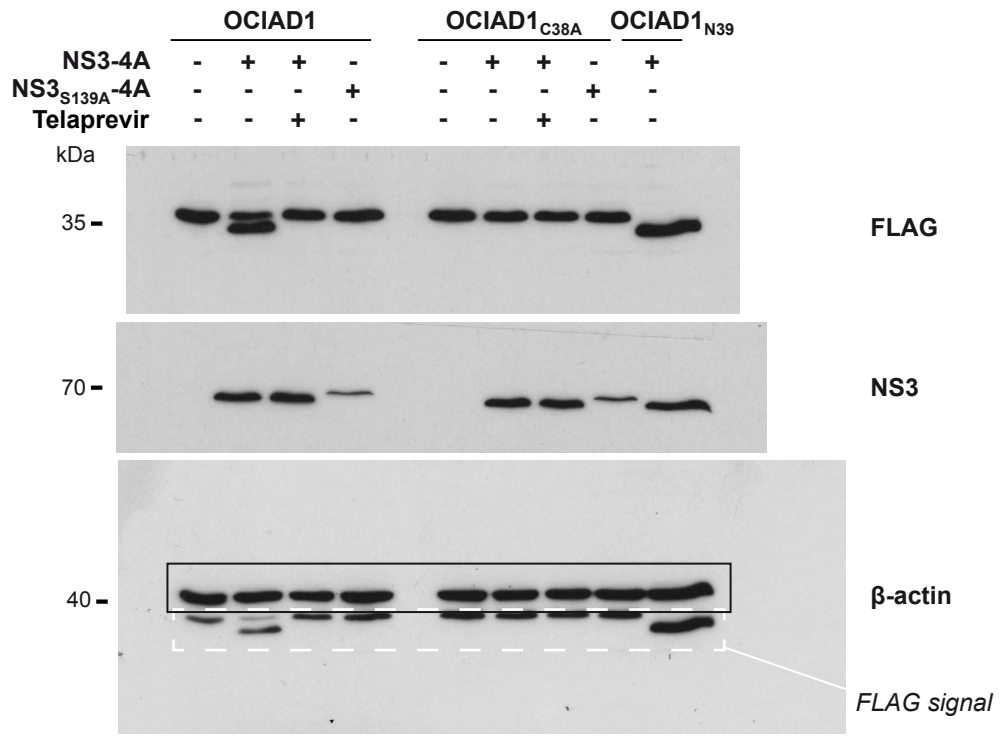

**Figure 2A**

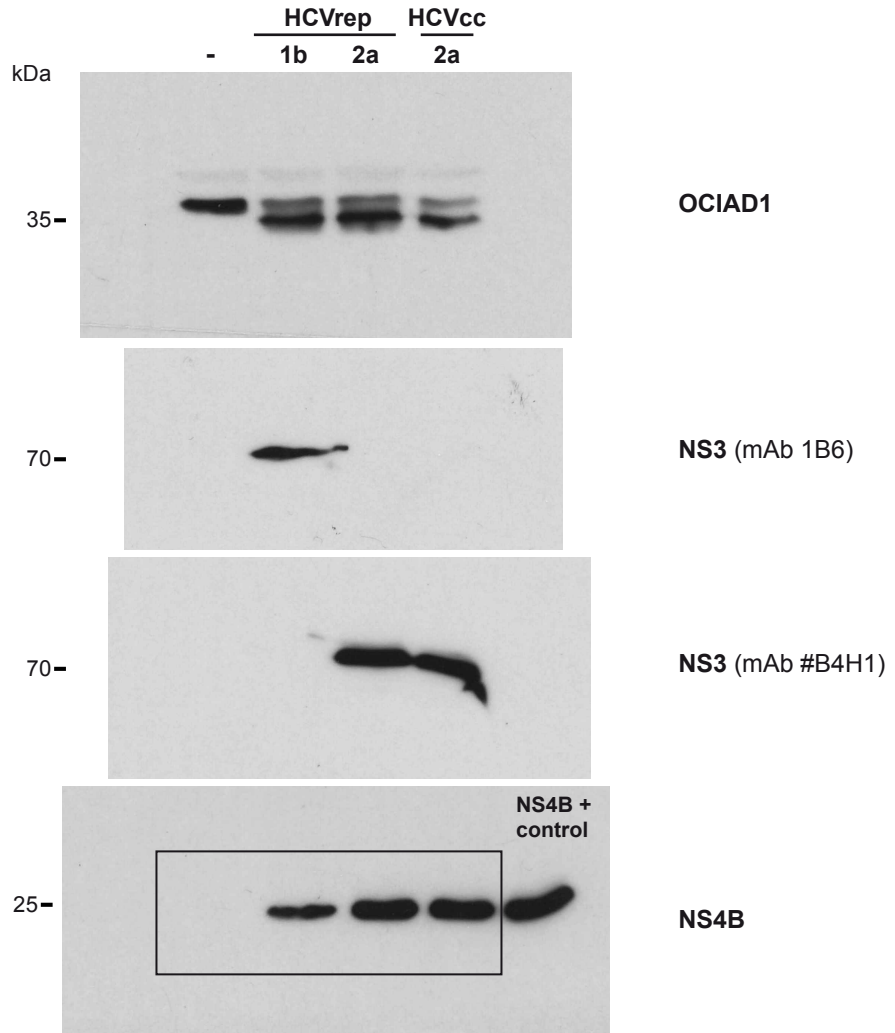

**Figure 2B**

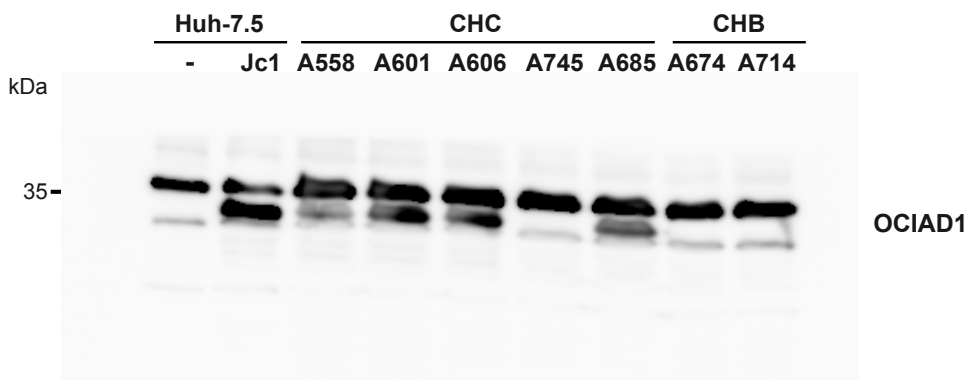

**Figure 3C**

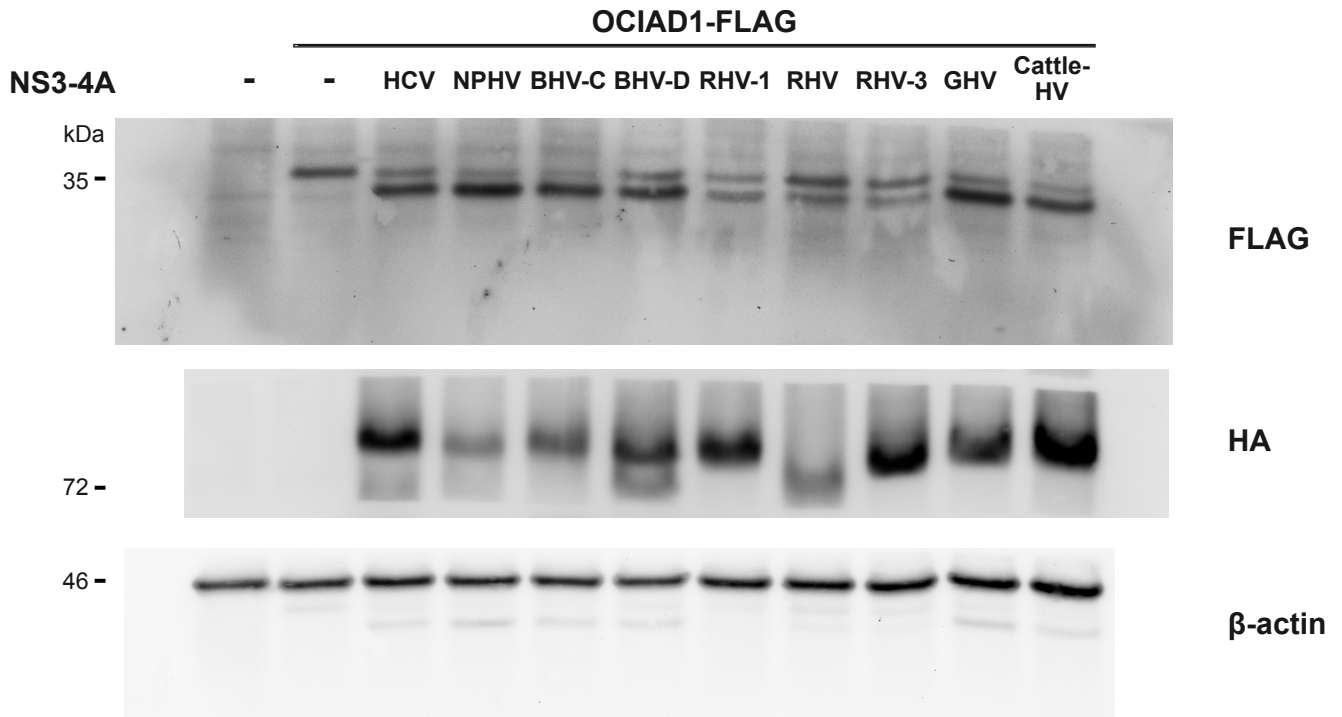

**Figure 4C**

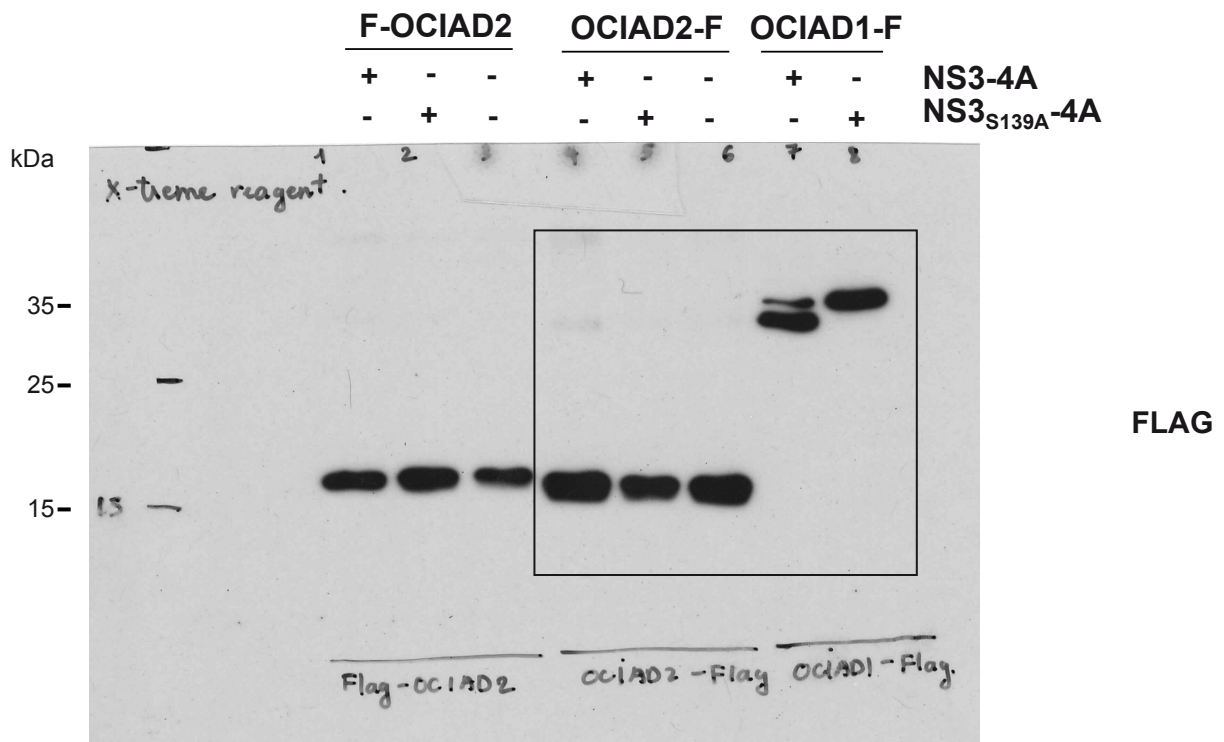

# Figure 5B

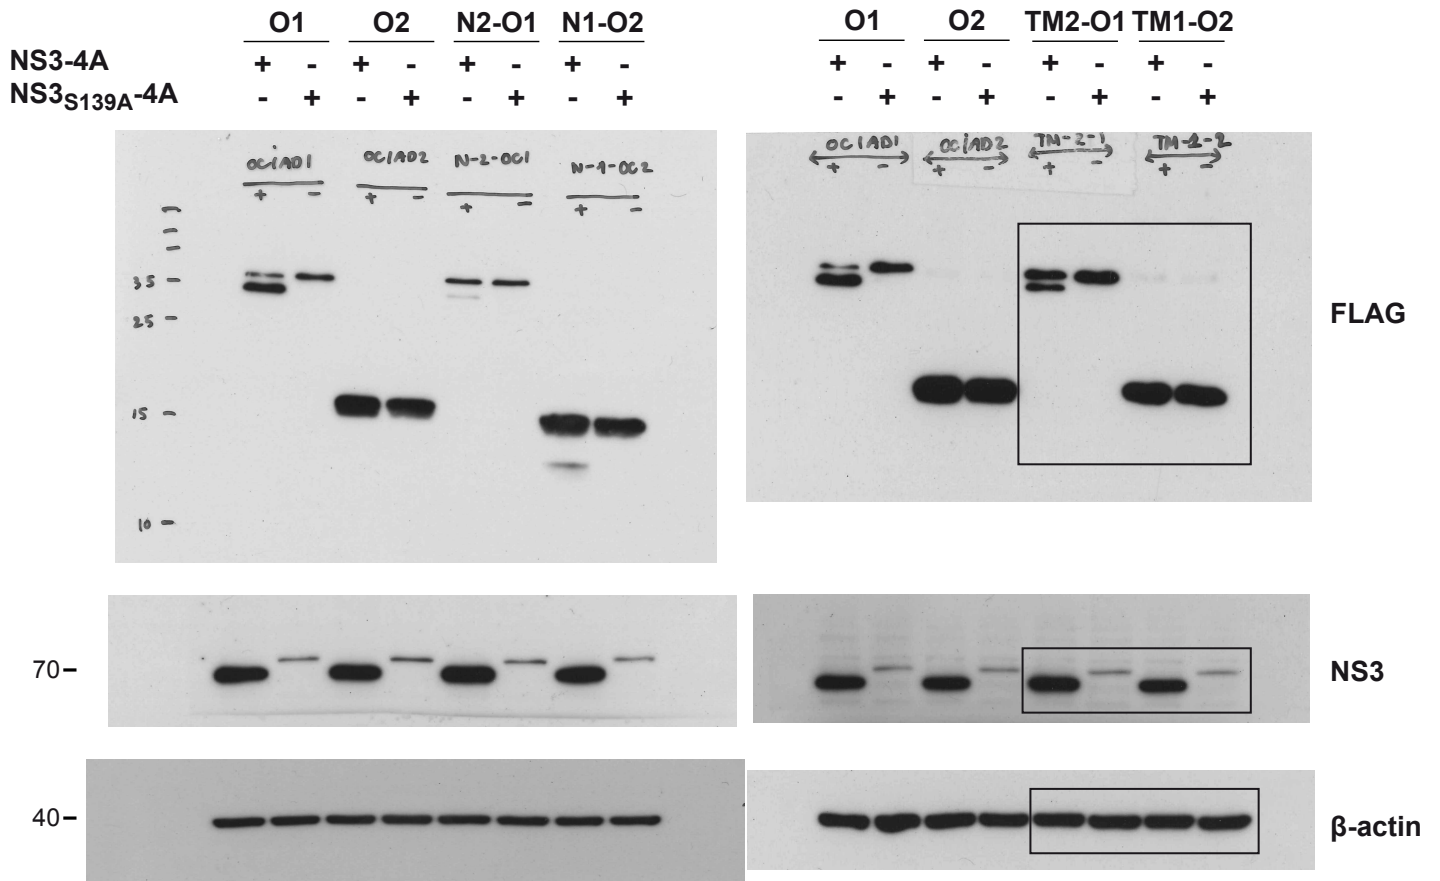

# Figure 6A

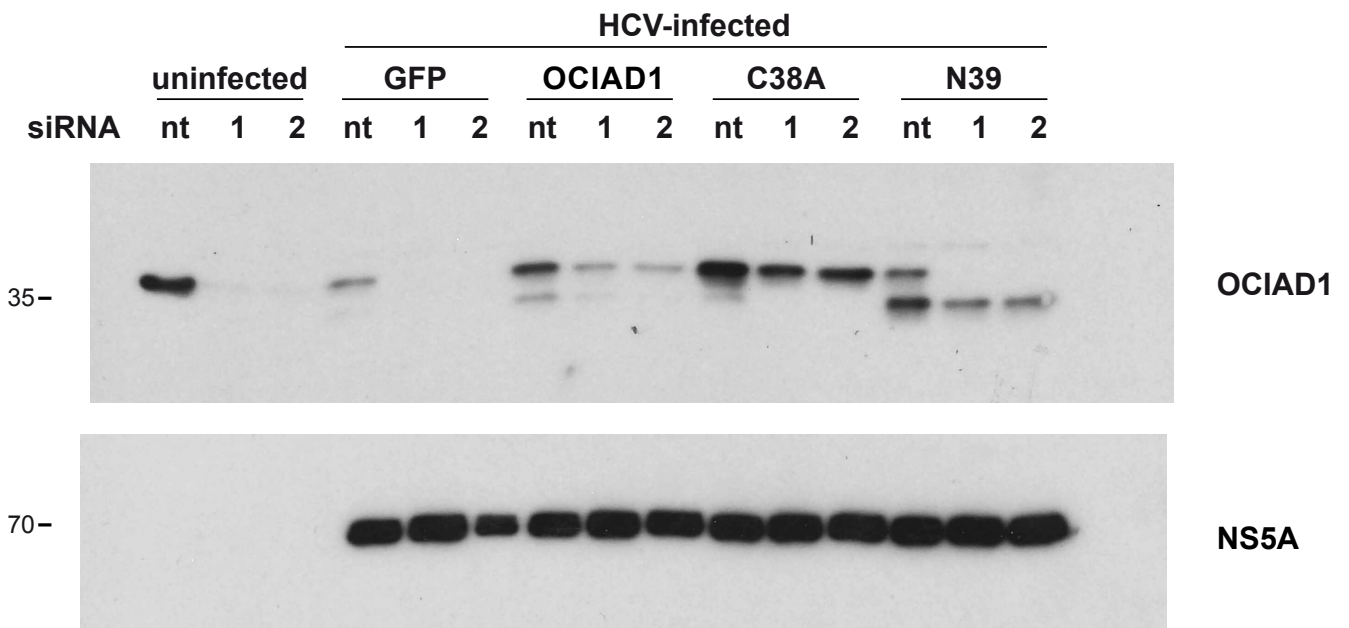

Supplement: pone.0236447.s001.pdf [file pone.0236447.s001.pdf]
